# Supplementary material
Source: PubMed Central journal article supplement (PMC8214762)
Supplement: joces-134-258437-s1.pdf [file joces-134-258437-s1.pdf]

### Figure S1. Overall polarity in the comb dendrite of *ddaE*.

A. Example kymographs were generated from dorsal comb-shaped dendrites of *ddaE* neurons expressing EB1-GFP with control RNAi or Trim9 RNAi 1. B. The graph shows quantification of microtubule polarity in dendrites of *ddaE* neurons. Numbers on the graph are numbers of EB1 comets analyzed for each genotype.

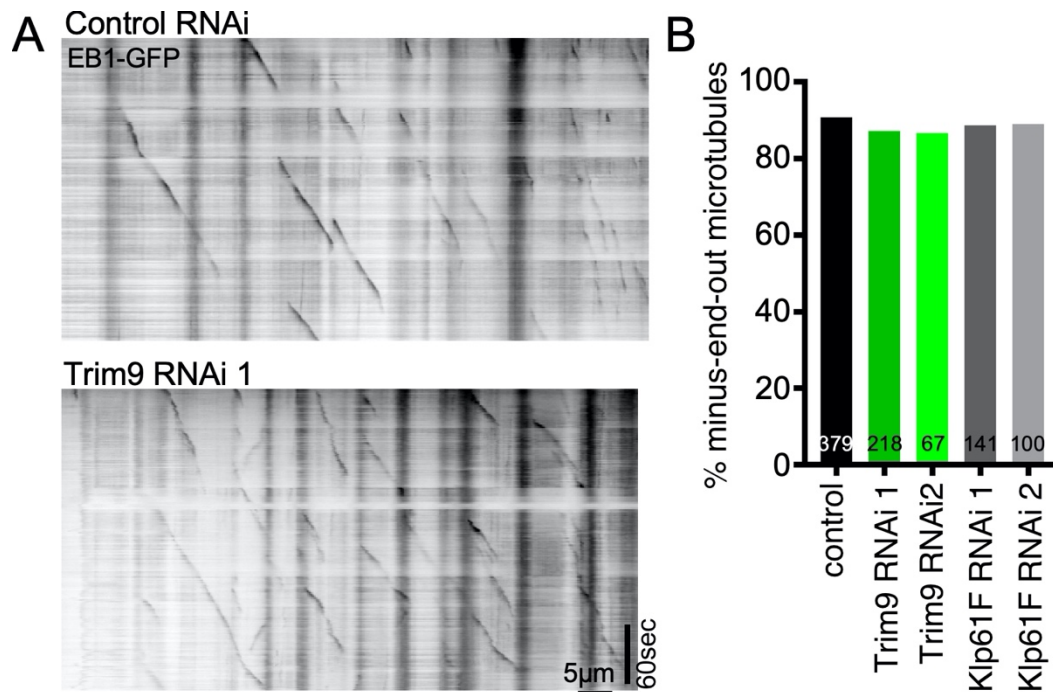

### Figure S2. Trim9-RB can associate with microtubules in the presence of EB1-GFP.

S2R<sup>+</sup> cells were transfected with pAc-Gal4 and pUAST-mNG-Trim9-RB and pUAST-EB1-TagRFP-T. An example of a cell expressing high levels of EB1-TagRFP-T is shown.

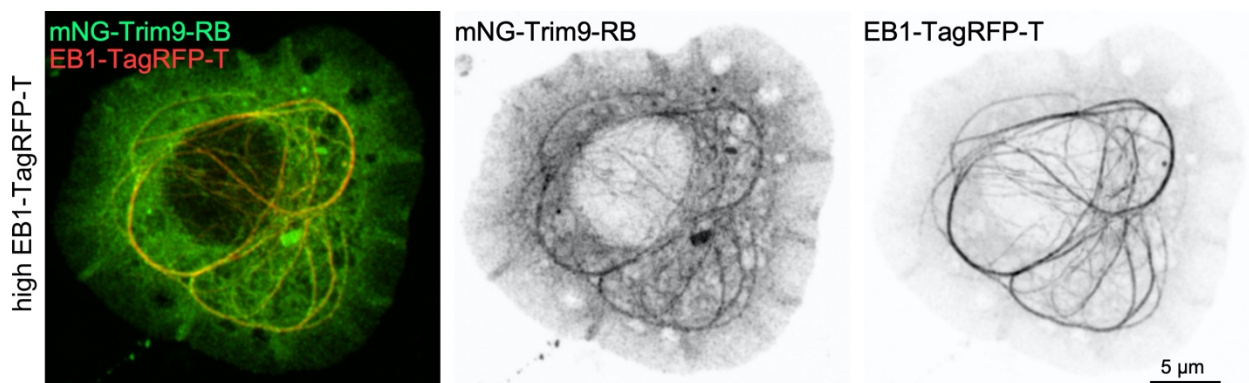

**Figure S3. Klp61F-mScarlet accumulates at dendrite branch points with Trim9.**

221-Gal4 was used to drive expression of Klp61F-mScarlet with mNG-tagged Trim9 or GFP-tagged EB1. Images of *ddaE* neurons are shown with mNG-Trim9-RA in A, mNG-Trim9-RB in B and EB1-GFP in C.

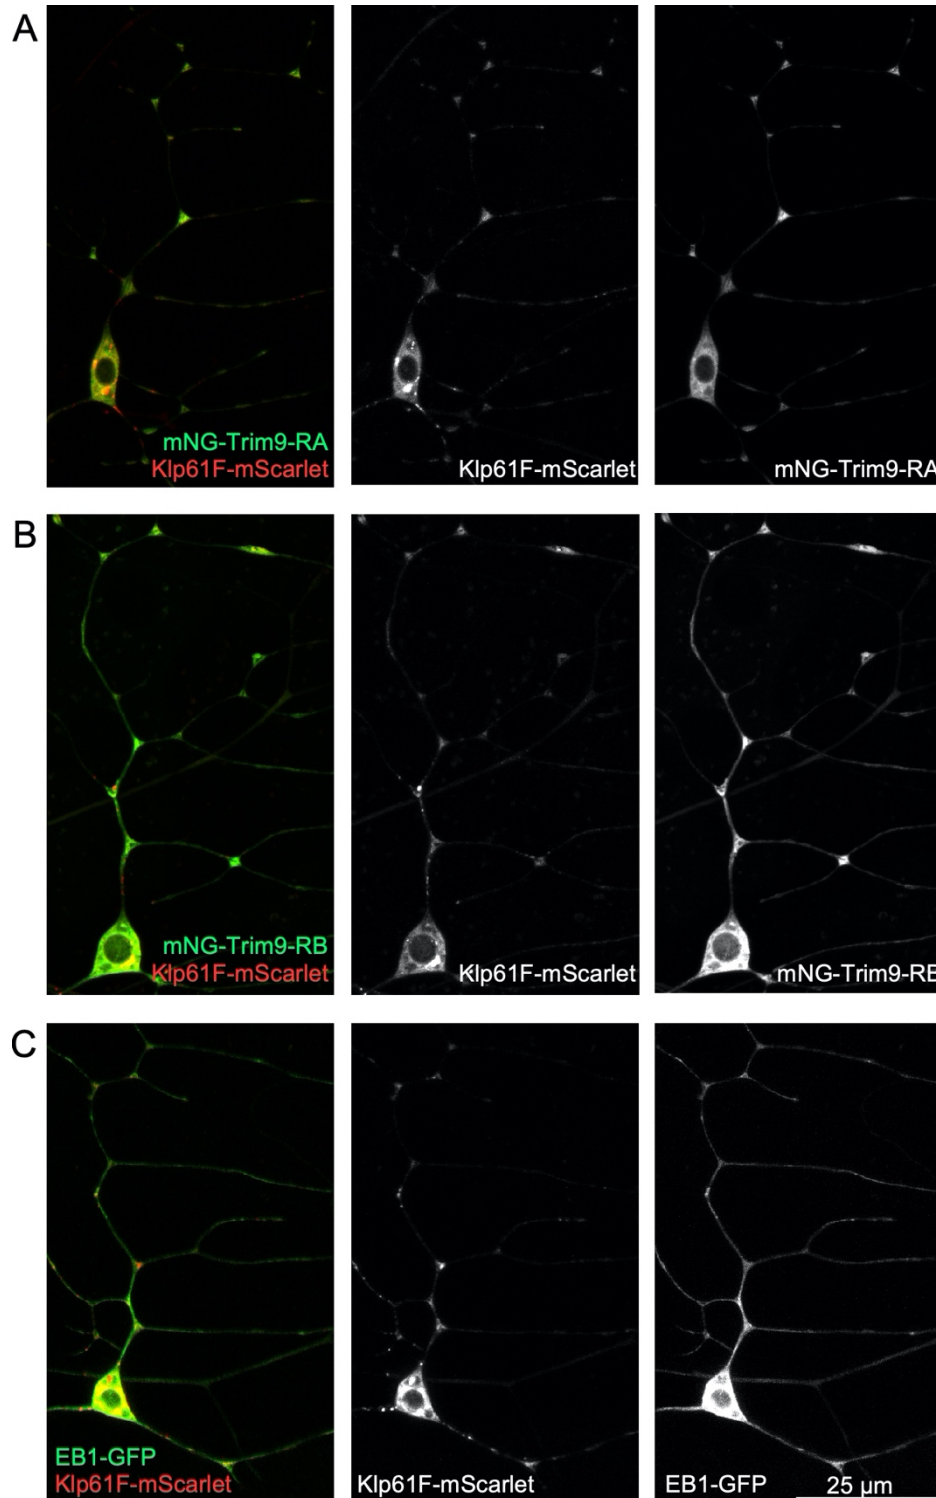

**Figure S4. Klp61F localizes to microtubules in S2 cells.**

S2R+ cells were transfected with pAc-Gal4 and either UAS-Klp61F-mScarlet, UAS-mNG-Trim9-RA or UAS-mNG-Trim9-RB or UAS-Klp61F-GFP. A. Cells were extracted with cold methanol and visualized directly. B. Cells were processed for immunostaining with  $\alpha$ Tubulin as in Figure 5.

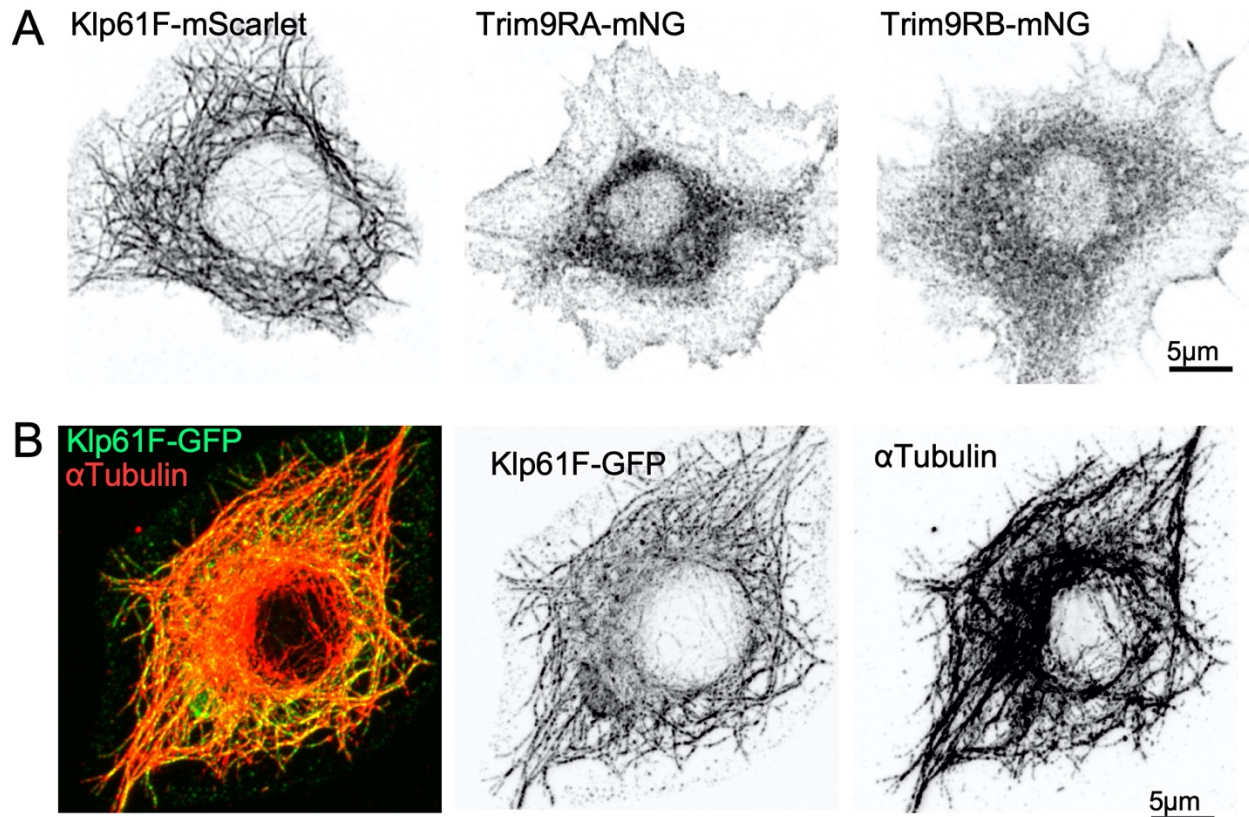

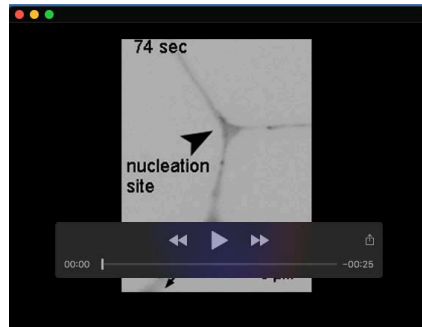

**Movie 1.** A segment of dendrite of *ddaE* neuron expressing EB1-GFP. Multiple EB1 comets emerged at the dendrite branch points.

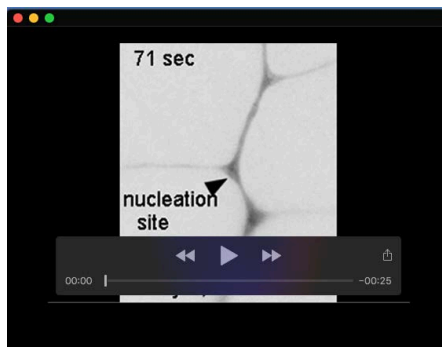

**Movie 2.** Nucleation events at the dendrite branch point of a *ddaE* neuron. Microtubule growth at the plus end was marked with EB1-GFP comets. Microtubule plus ends were growing towards the wrong direction.

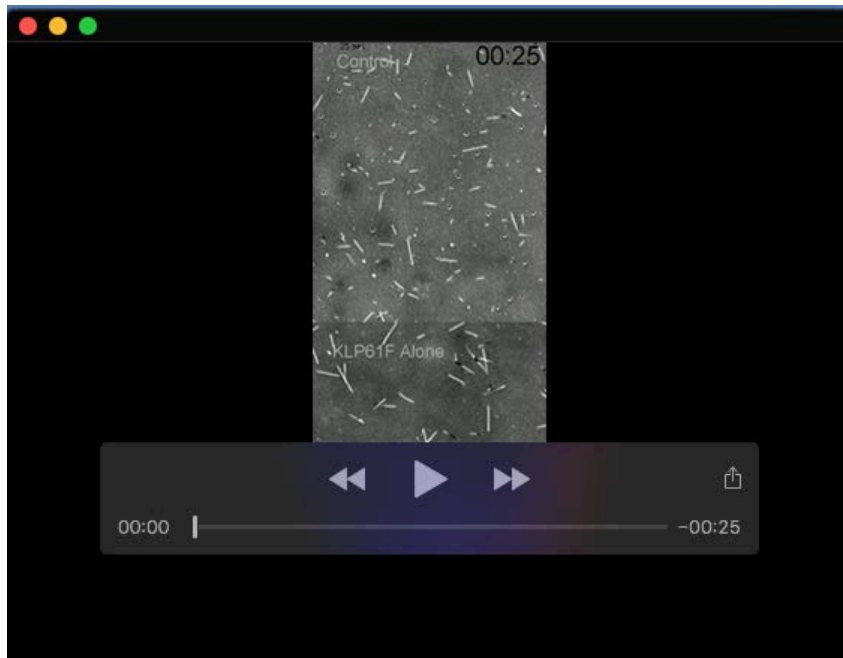

**Movie 3.** Microtubule in vitro growth with purified tubulin dimers. Adding chimeric Klp61F protein promoted persistent microtubule polymerization.

**Table S1.** A list of plasmids, Drosophila stocks and other reagents used in the manuscript is provided.

[Click here to download Table S1](#)
